# Supplementary material for: Glycol metalloporphyrin derivatives in solution or immobilized on LDH and silica: synthesis, characterization and catalytic features in oxidation reactions
Source: Royal Society of Chemistry journal article supplement (doi:10.1039/c3cy00472d), 2013-10-23
Supplement: c3cy00472d.pdf [file c3cy00472d.pdf]

†Electronic Supplementary Information (ESI) available: [NMR  $^1\text{H}$  and  $^{19}\text{F}$ , FTIR, HRMS and UV-vis of the free-base porphyrins P2-P6. UV-vis, MALDI(TOF/TOF) and HRMS of the metalloporphyrins.

## Glycol metalloporphyrin derivatives in solution or immobilized on LDH and silica: synthesis, characterization and catalytic features in oxidation reactions

Kelly A. D. F. Castro,<sup>a,b</sup> Mário M. Q. Simões<sup>b</sup>, M. Graça P. M. S. Neves,<sup>\*b</sup> José A. S. Cavaleiro<sup>b</sup>, Fernando Wypych<sup>a</sup> and Shirley Nakagaki<sup>\*a</sup>

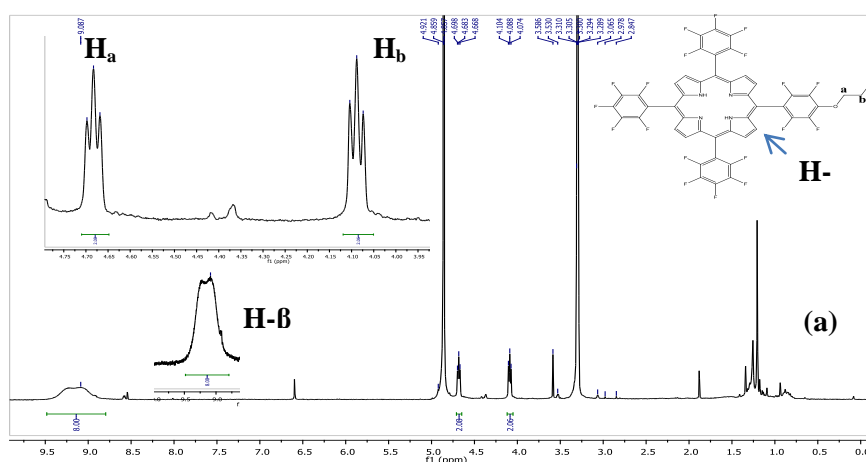

(a)

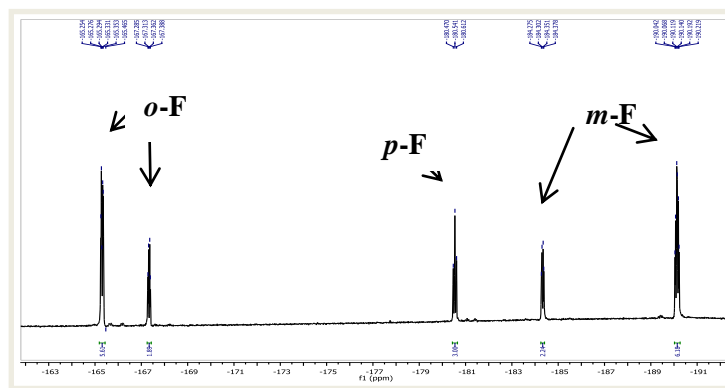

(b)

Figure S1. NMR spectra of porphyrin P2:  $^1\text{H}$  (a) and  $^{19}\text{F}$  (b).

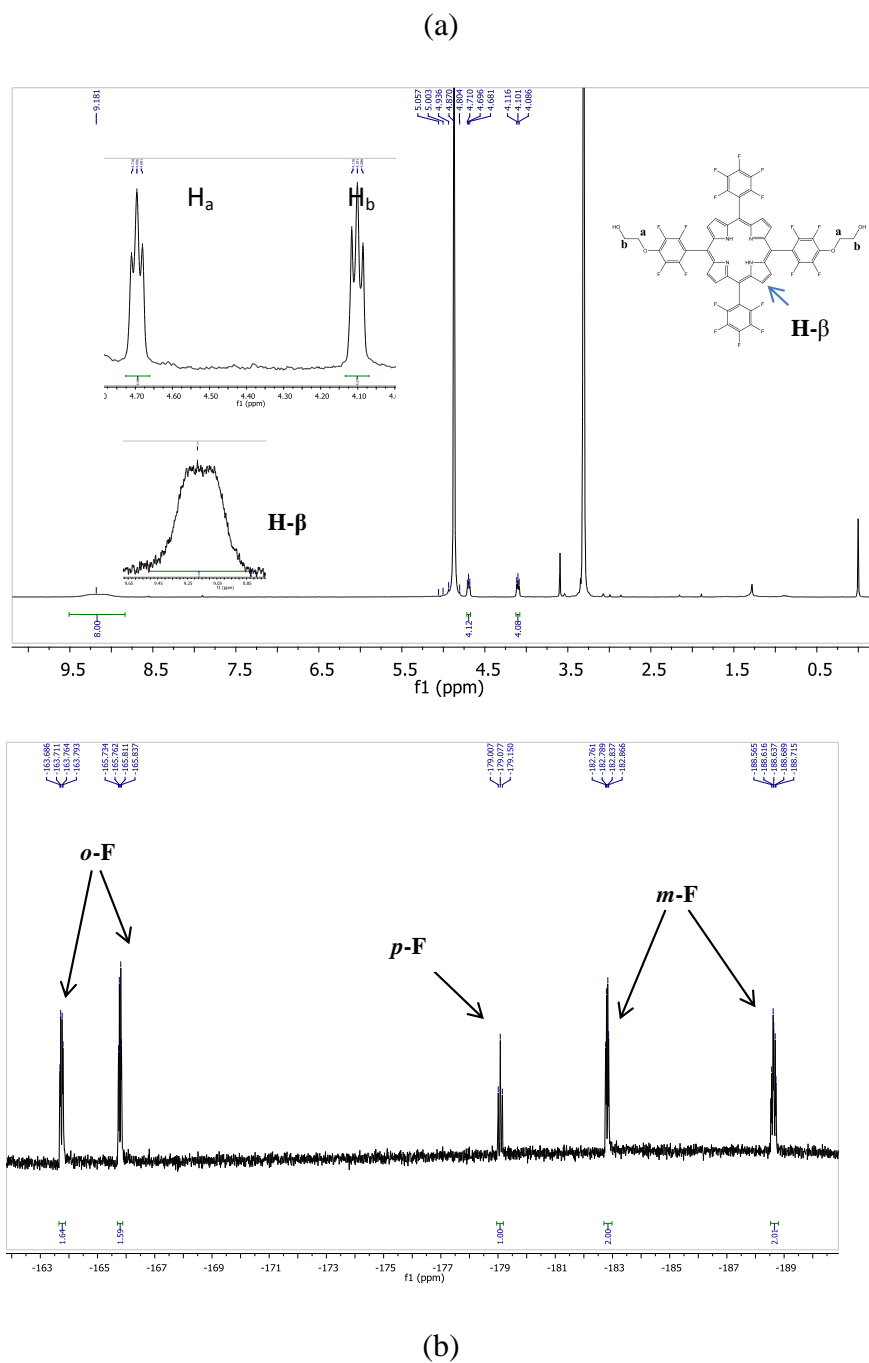

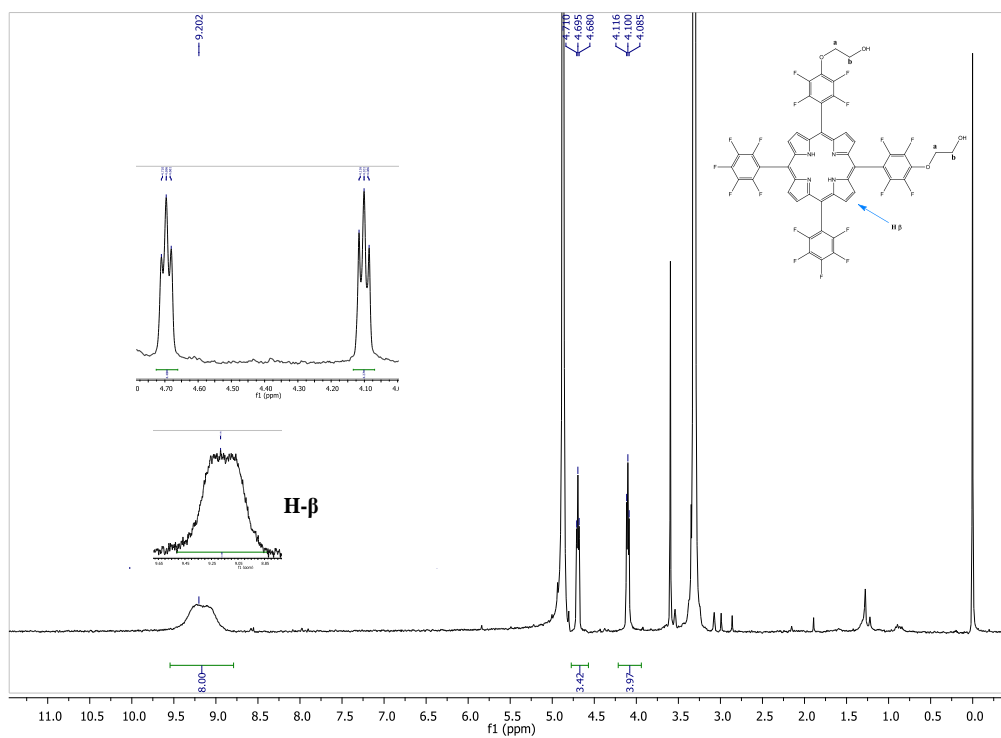

(a)

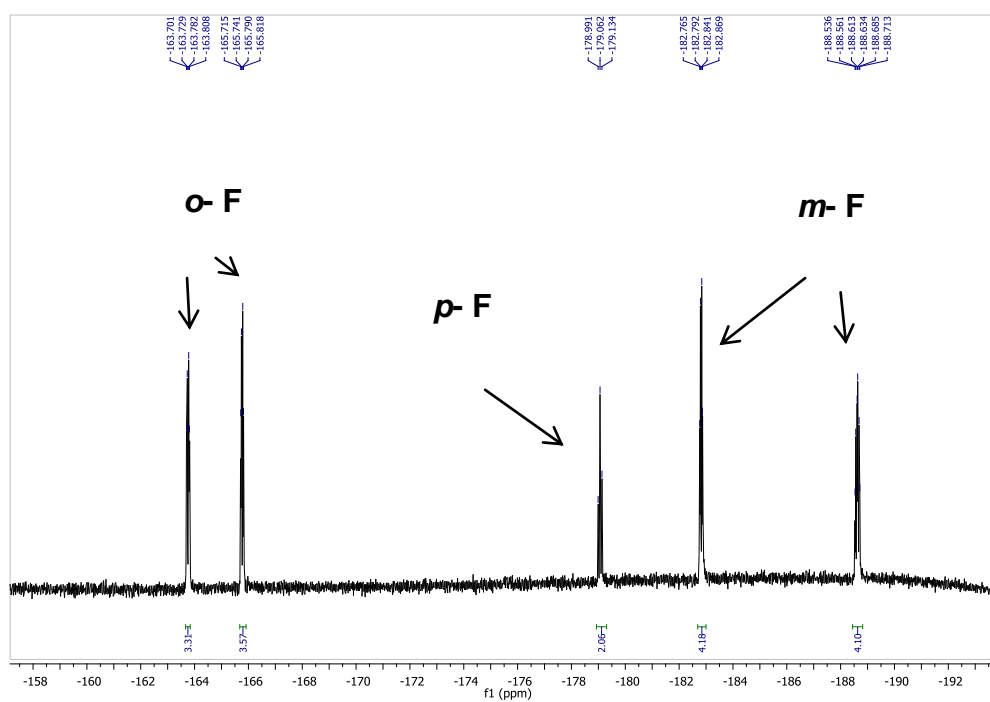

(b)

**Figure S3.** NMR spectra of porphyrin **P4**:  $^1\text{H}$  (a) and  $^{19}\text{F}$  (b).

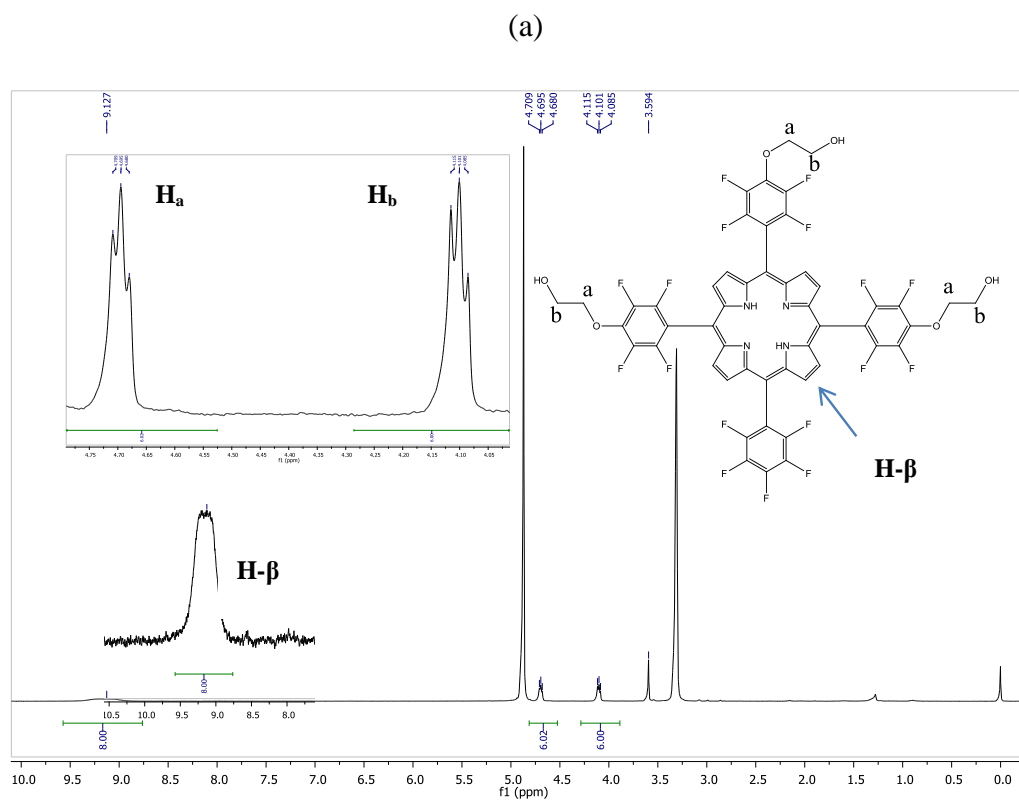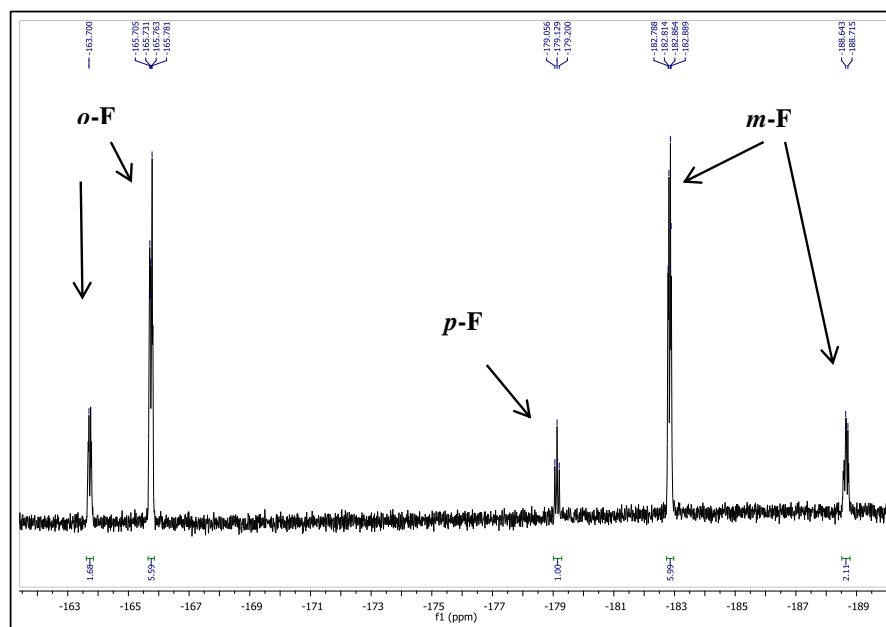

**Figure S4.** NMR spectra of porphyrin **P5**:  $^1\text{H}$  (a) and  $^{19}\text{F}$  (b).

(a)

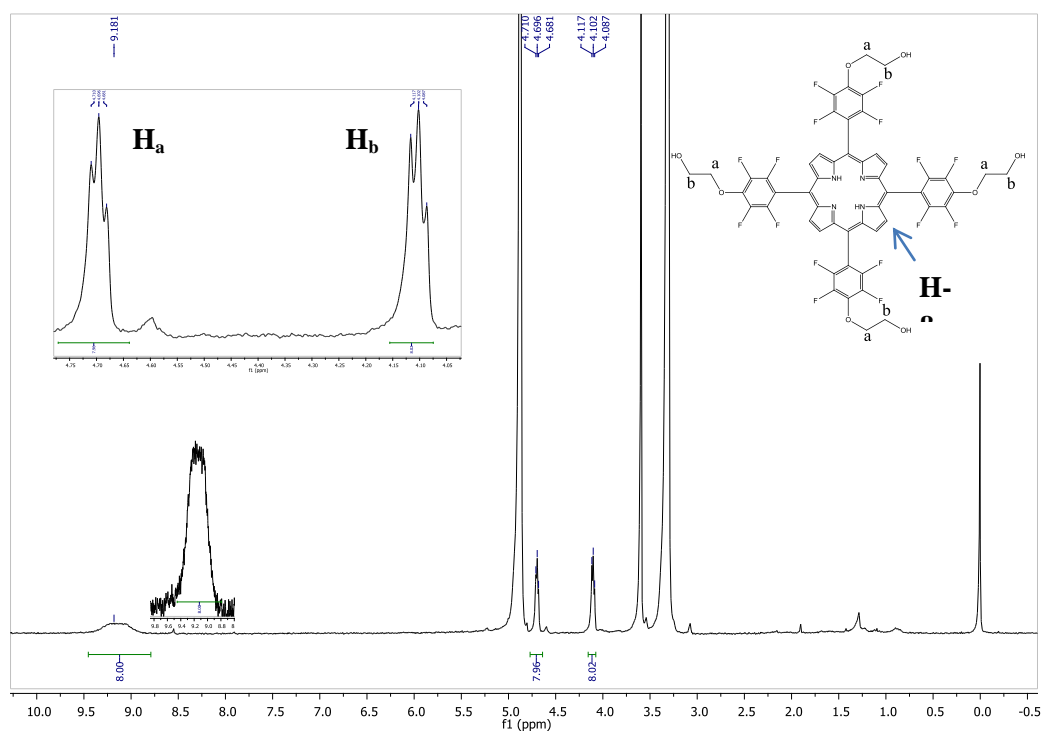

(b)

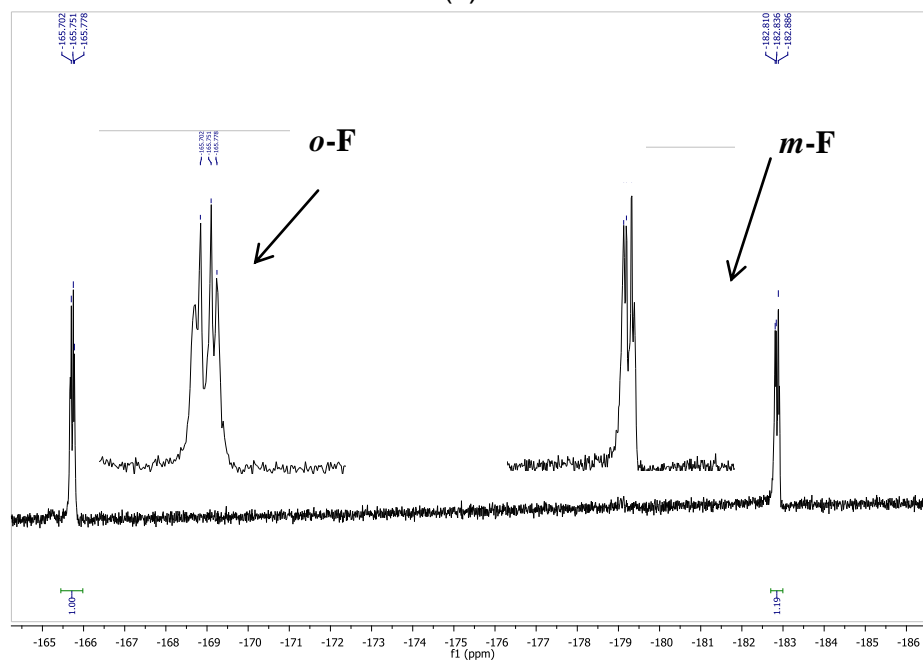

Figure S5. NMR spectra of porphyrin **P6**:  $^1\text{H}$  (a) and  $^{19}\text{F}$  (b).

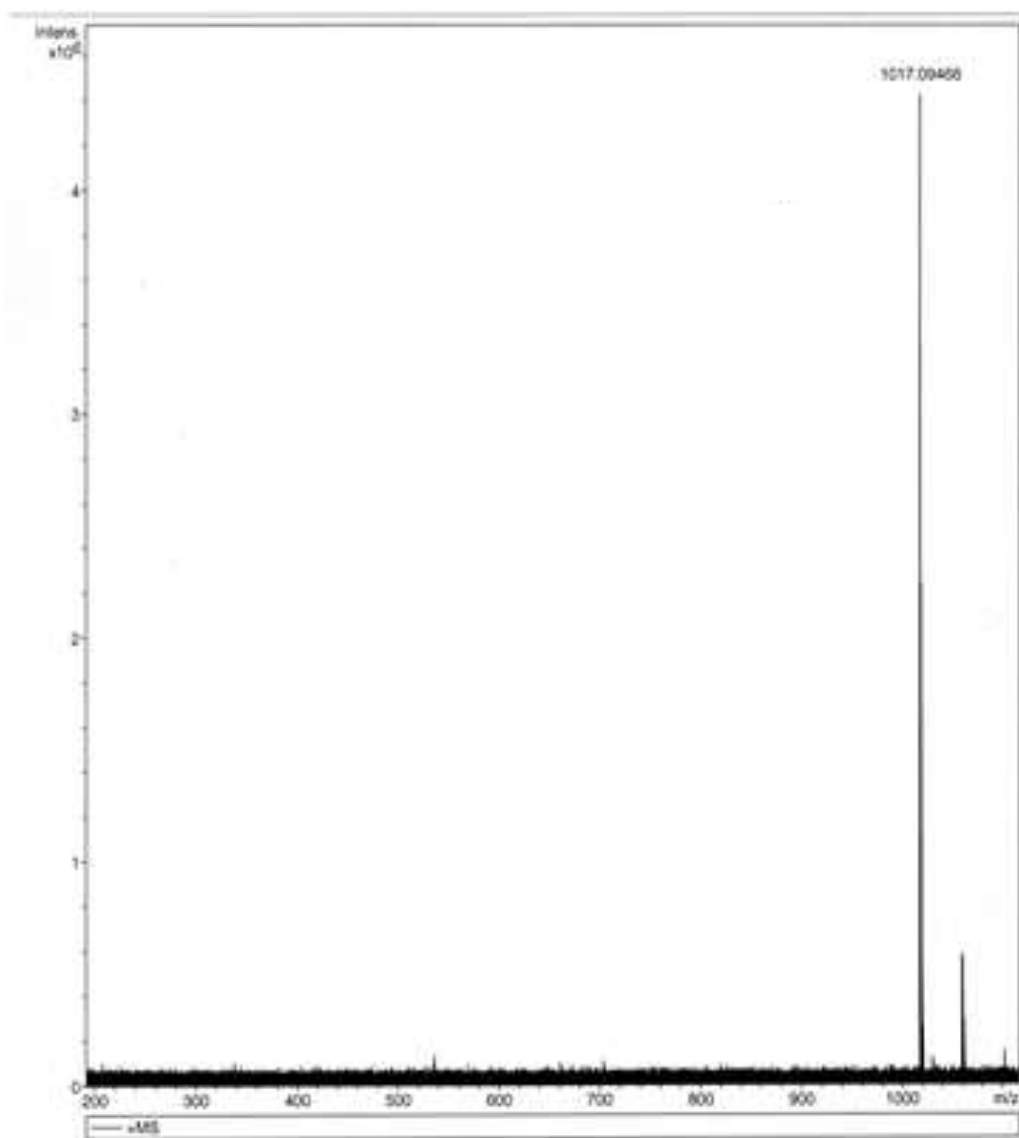

**Figure S6.** High-resolution mass spectra (FAB<sup>+</sup>) - porphyrin **P2**.

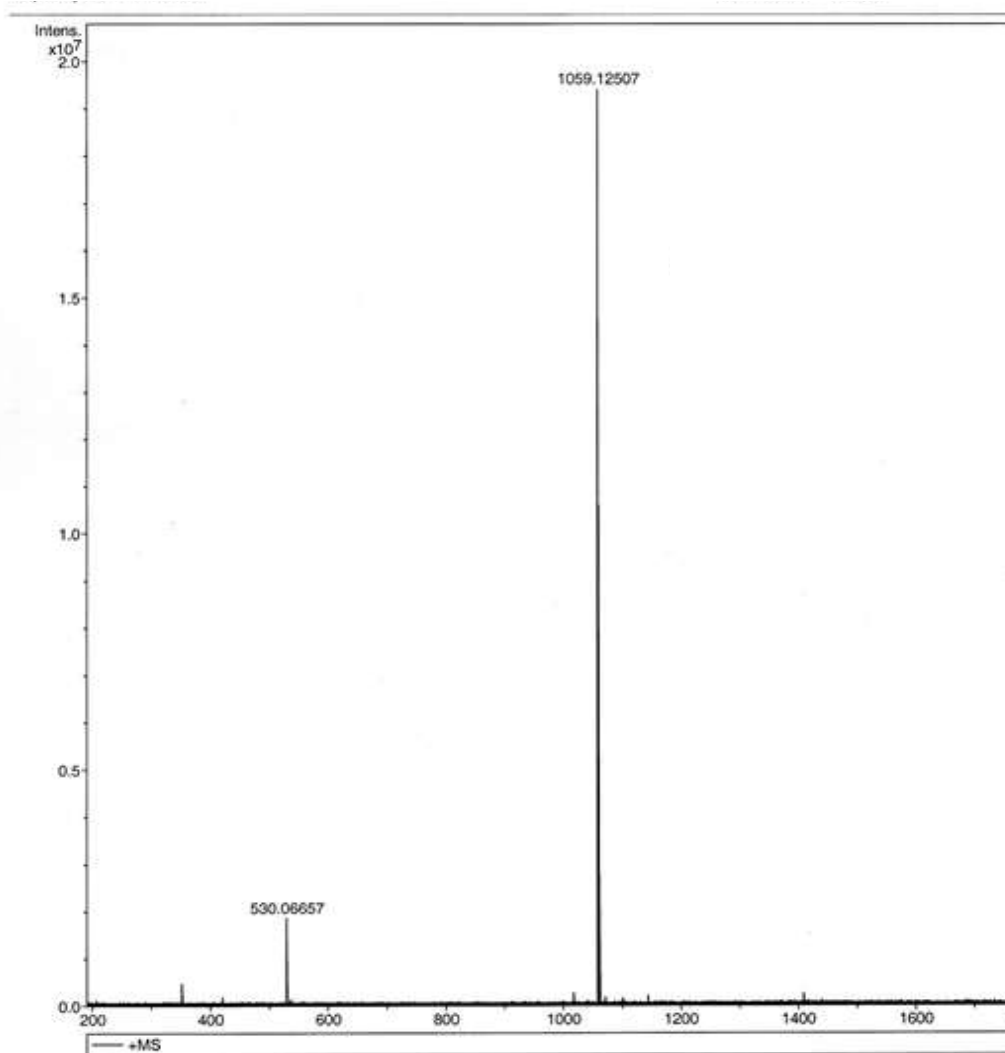

**Figure S7.** High-resolution mass spectra (FAB<sup>+</sup>) - porphyrin **P3**.

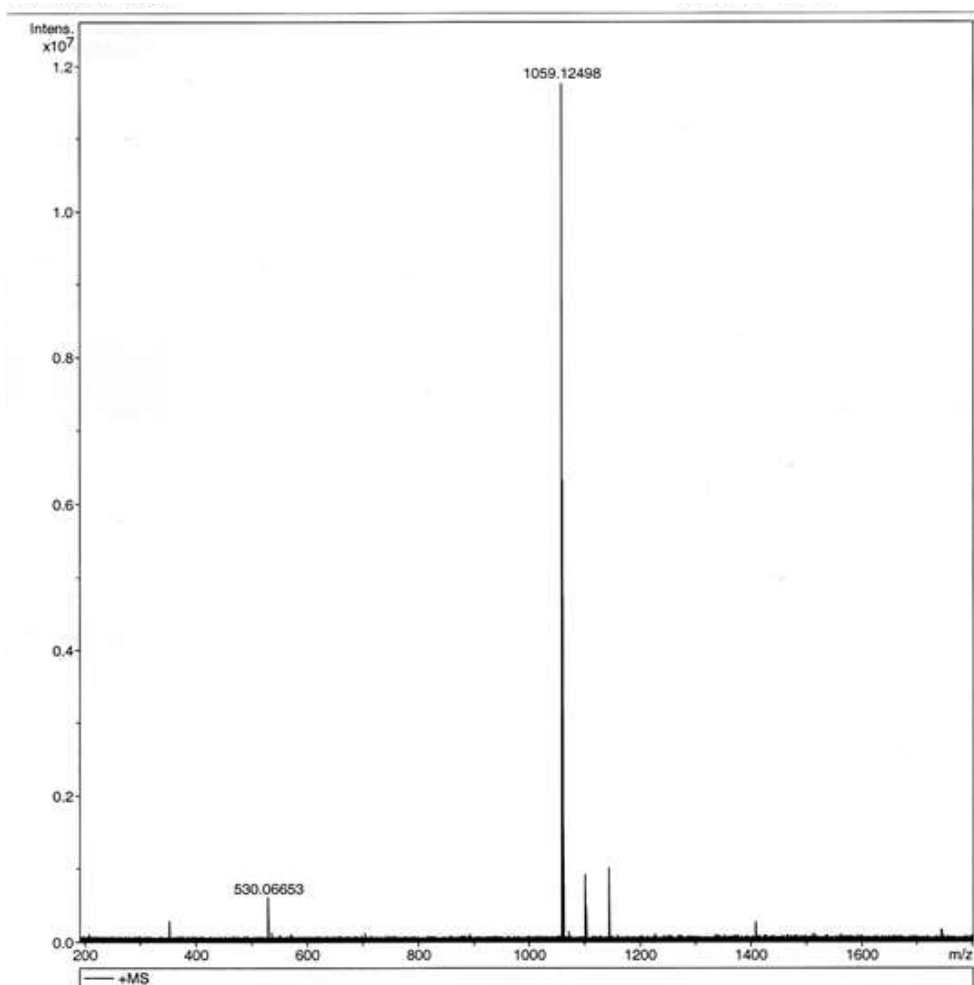

**Figure S8.** High-resolution mass spectra (FAB<sup>+</sup>) - porphyrin **P4**.



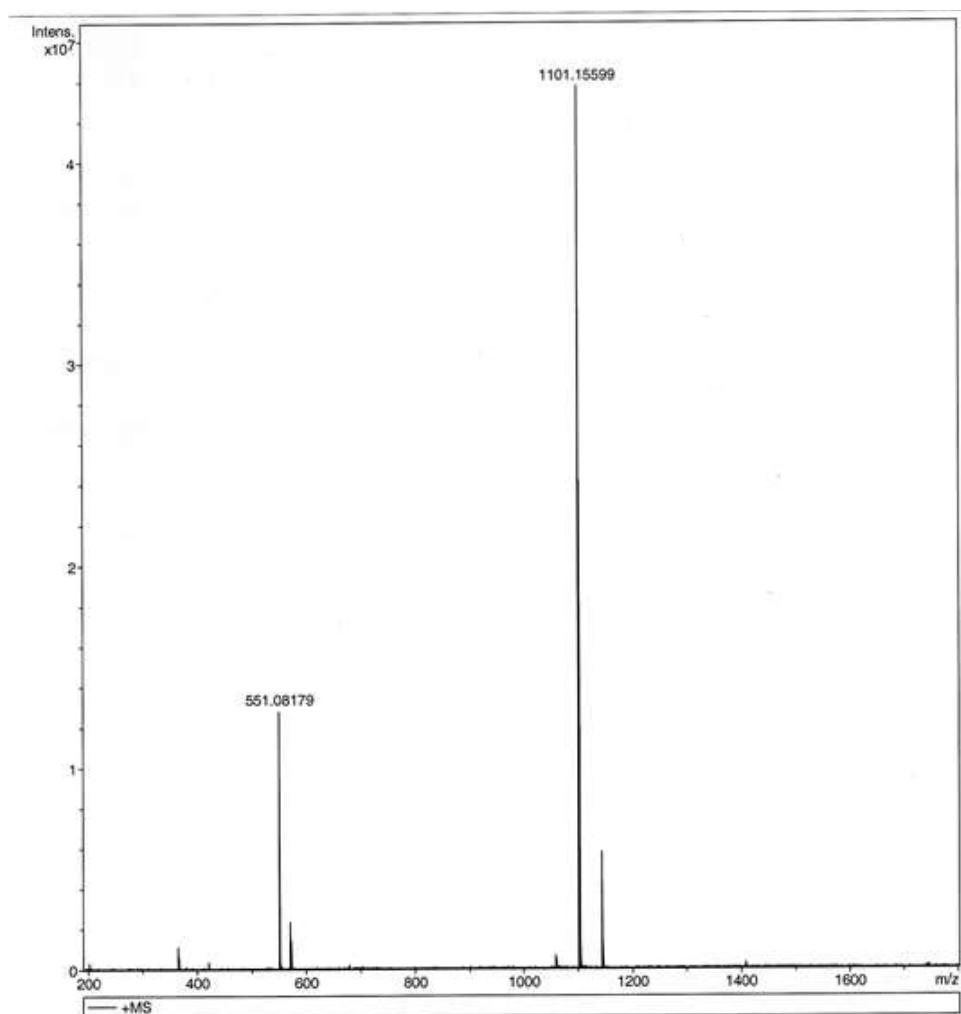

**Figure S9.** High-resolution mass spectra (FAB<sup>+</sup>) - porphyrin **P5**.

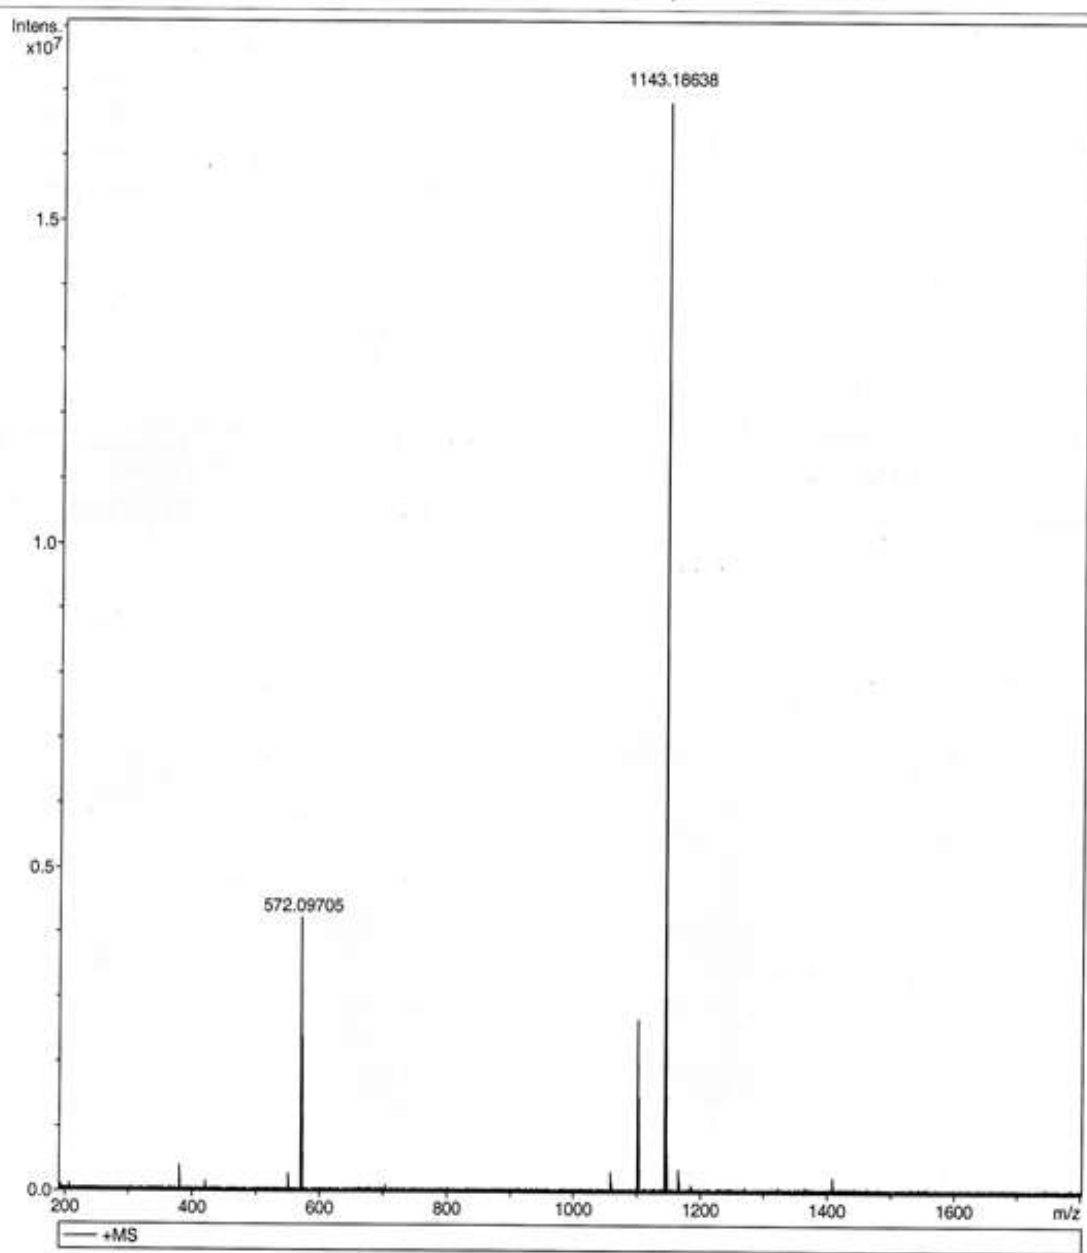

**Figure S10.** High-resolution mass spectra (FAB<sup>+</sup>) - porphyrin **P6**.

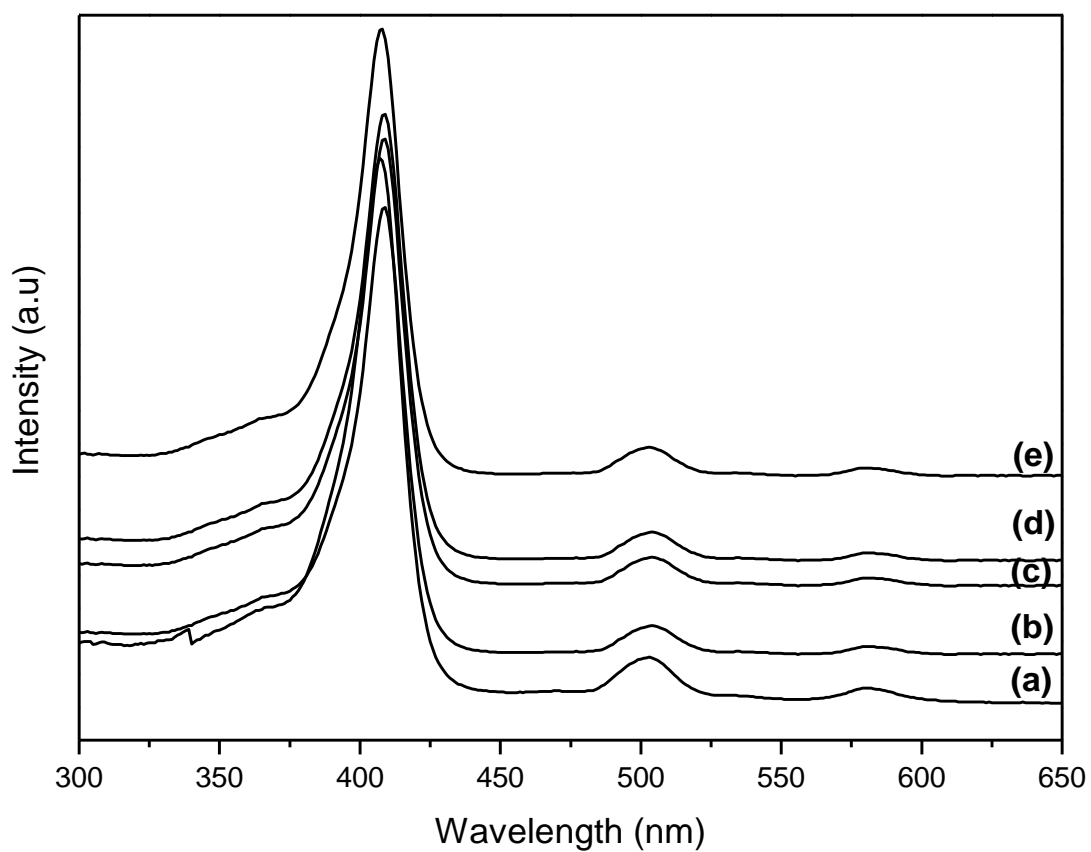

**Figure S11.** UV-vis spectra of porphyrins (**P2-P6**) in CH<sub>2</sub>Cl<sub>2</sub>: (a) Porphyrin **P2**, (b) Porphyrin **P3**, (c) Porphyrin **P4**, (d) Porphyrin **P5**, and (e) Porphyrin **P6**.

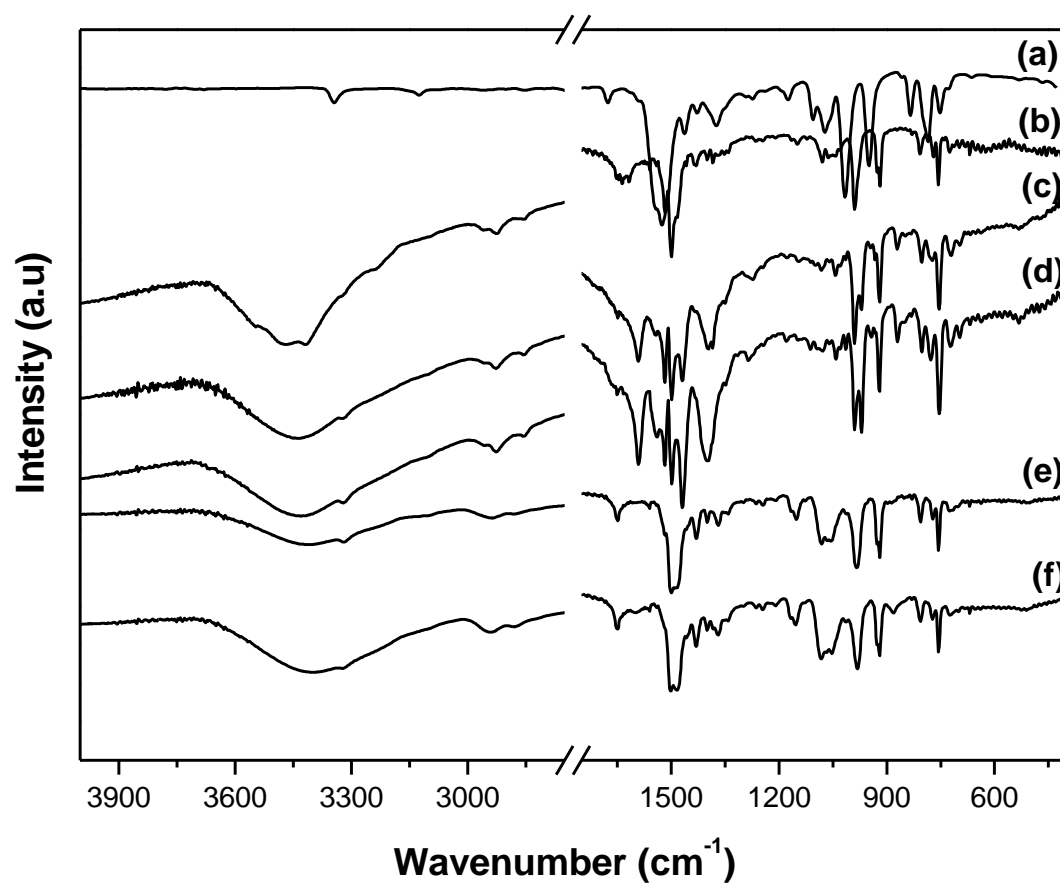

**Figure S12.** FTIR spectra of porphyrins (**P1- P6**): (a) Porphyrin **P1**, (b) Porphyrin **P2**, (c) Porphyrin **P3**, (d) Porphyrin **P4**, (e) Porphyrin **P5**, and (f) Porphyrin **P6**.

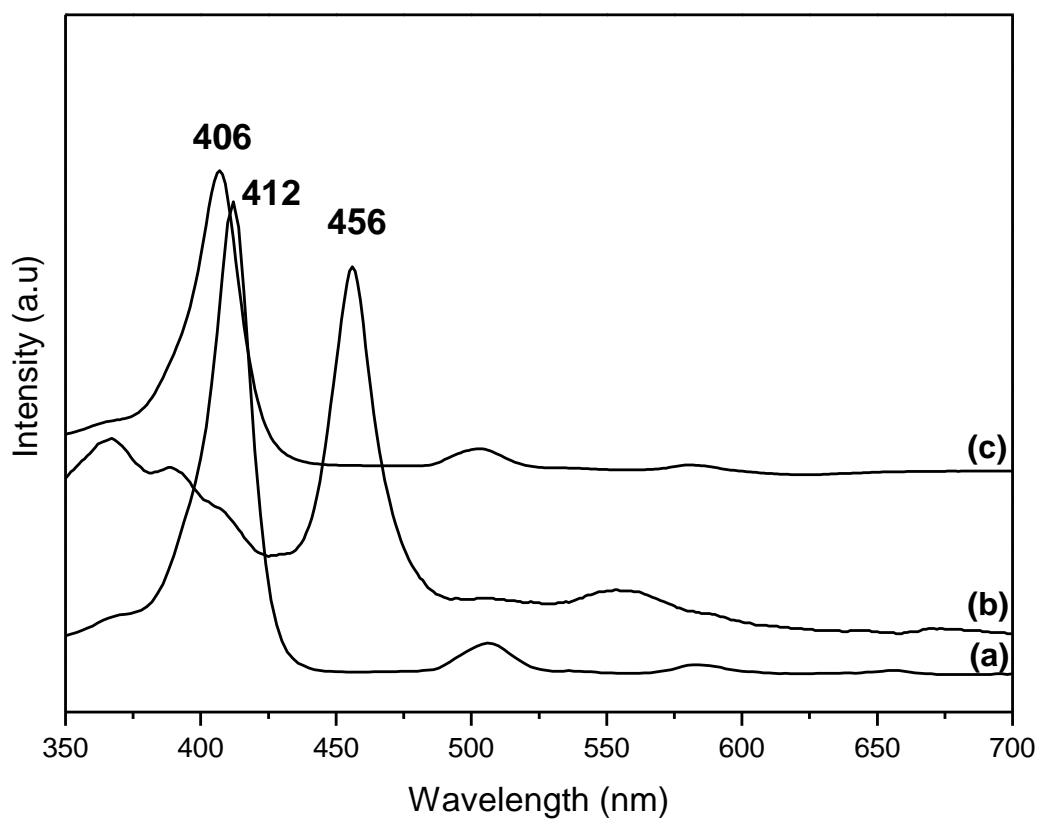

**Figure S13.** UV-Vis spectra in methanol: (a) **P2**, (b) **MnP9**, and (c) **FeP7** (350-700 nm).

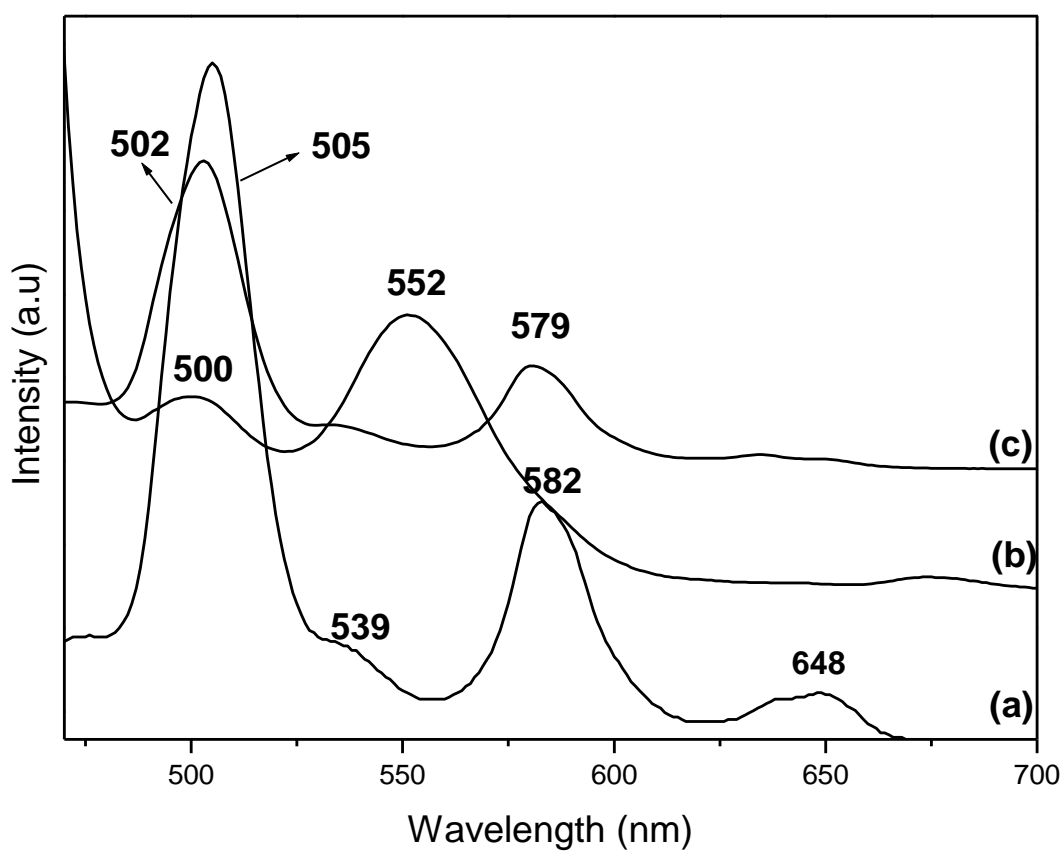

**Figure S14.** UV-vis spectra in methanol: (a) **P2**, (b) **FeP7**, and (c) **MnP9** (amplification).

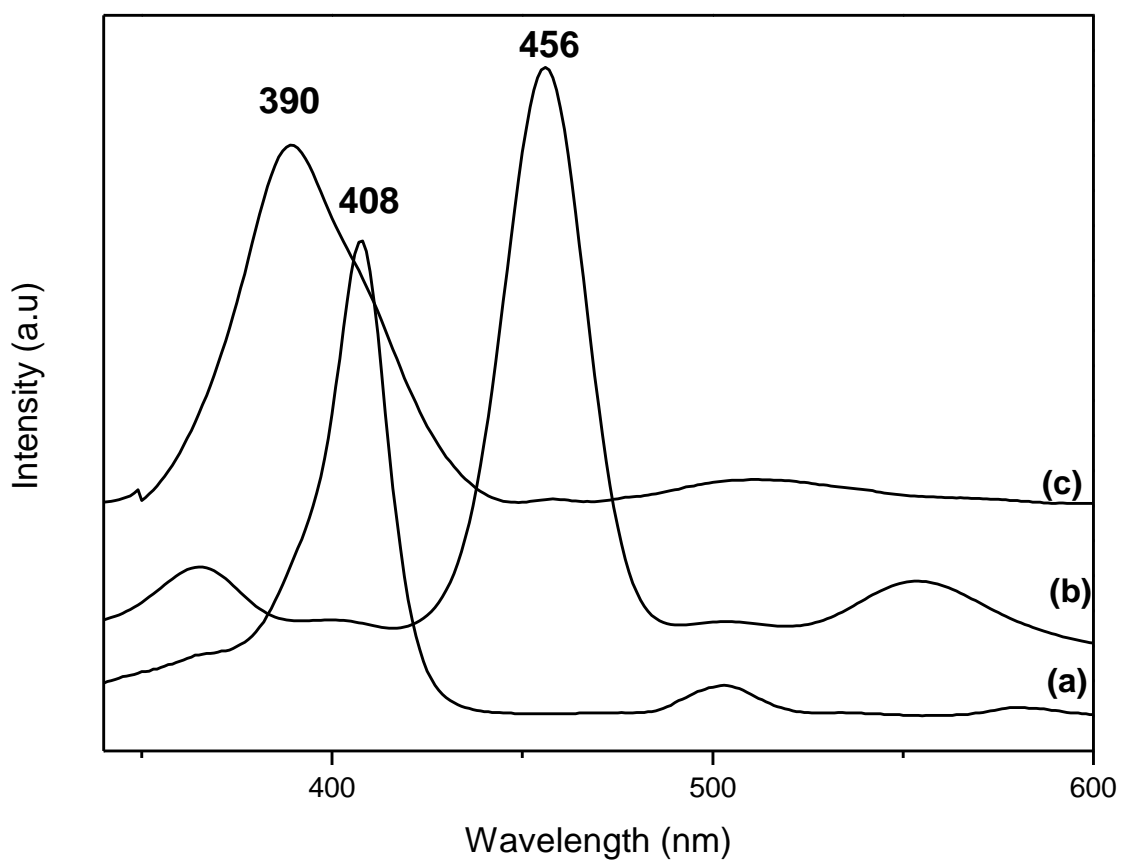

**Figure S15.** UV-Vis spectra in methanol: (a) **P6**, (b) **MnP10**, and (c) **FeP8** (300-600 nm).

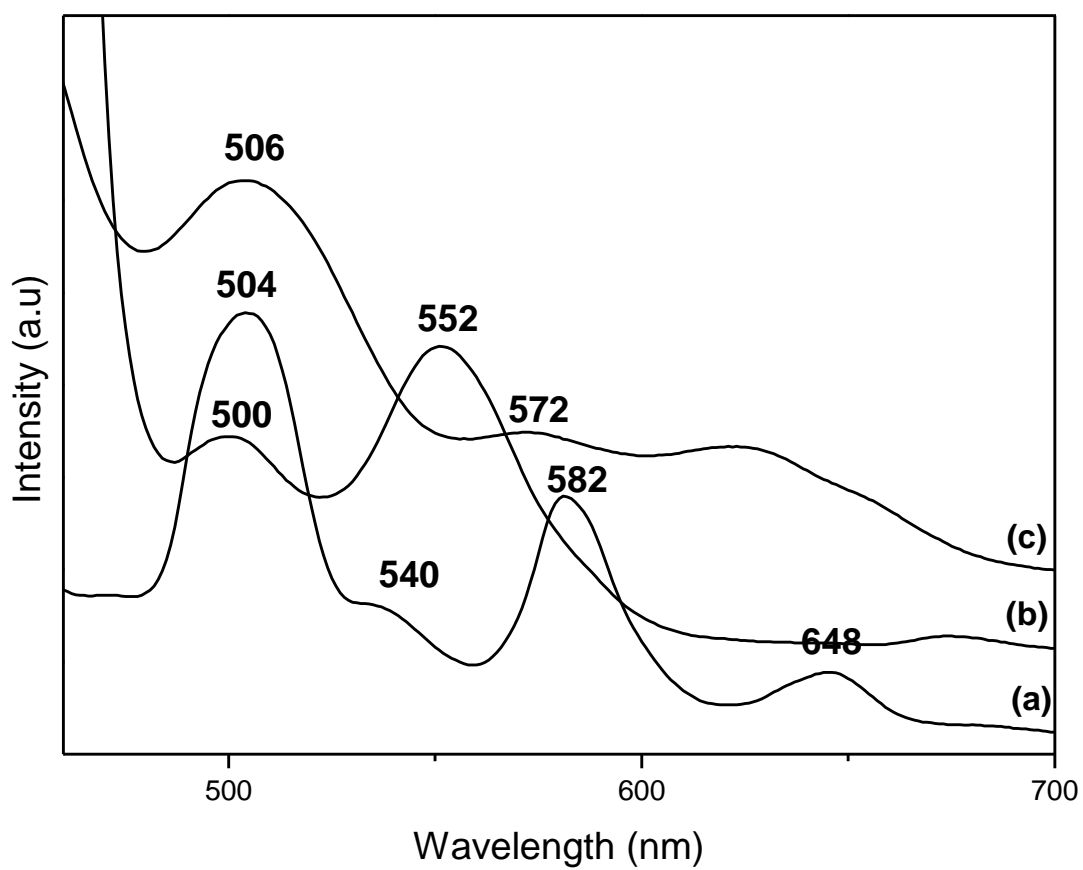

**Figure S16.** UV-Vis spectra in methanol: (a) **P6**, (b) **MnP10**, and (c) **FeP8** (450-700 nm).



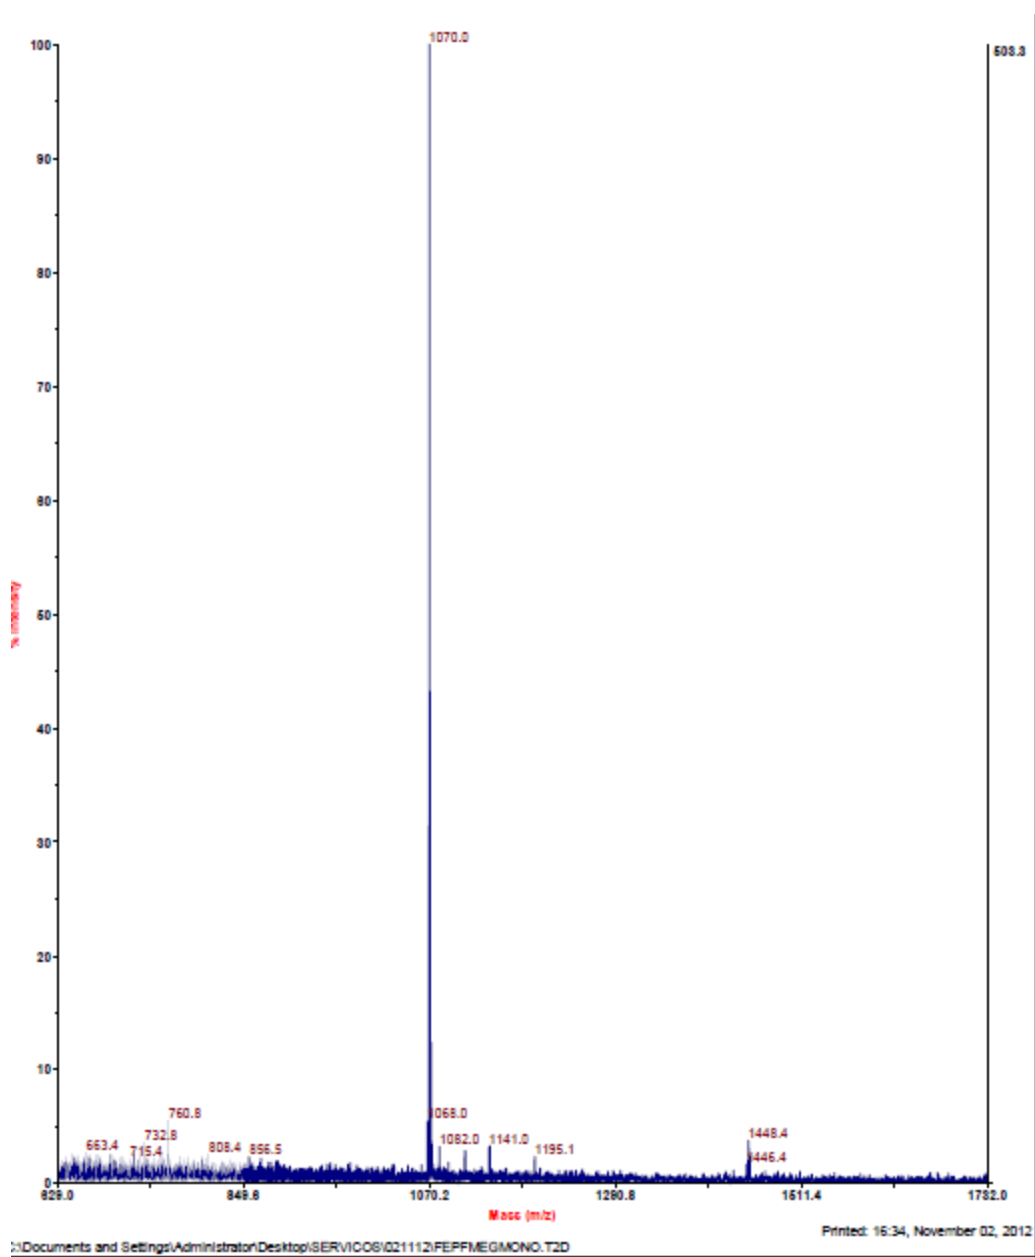

**Figure S17.** Matrix-Assisted Laser. Desorption Ionization – Time of Flight (MALDI-TOF/TOF) mass spectra - porphyrin **FeP7**.

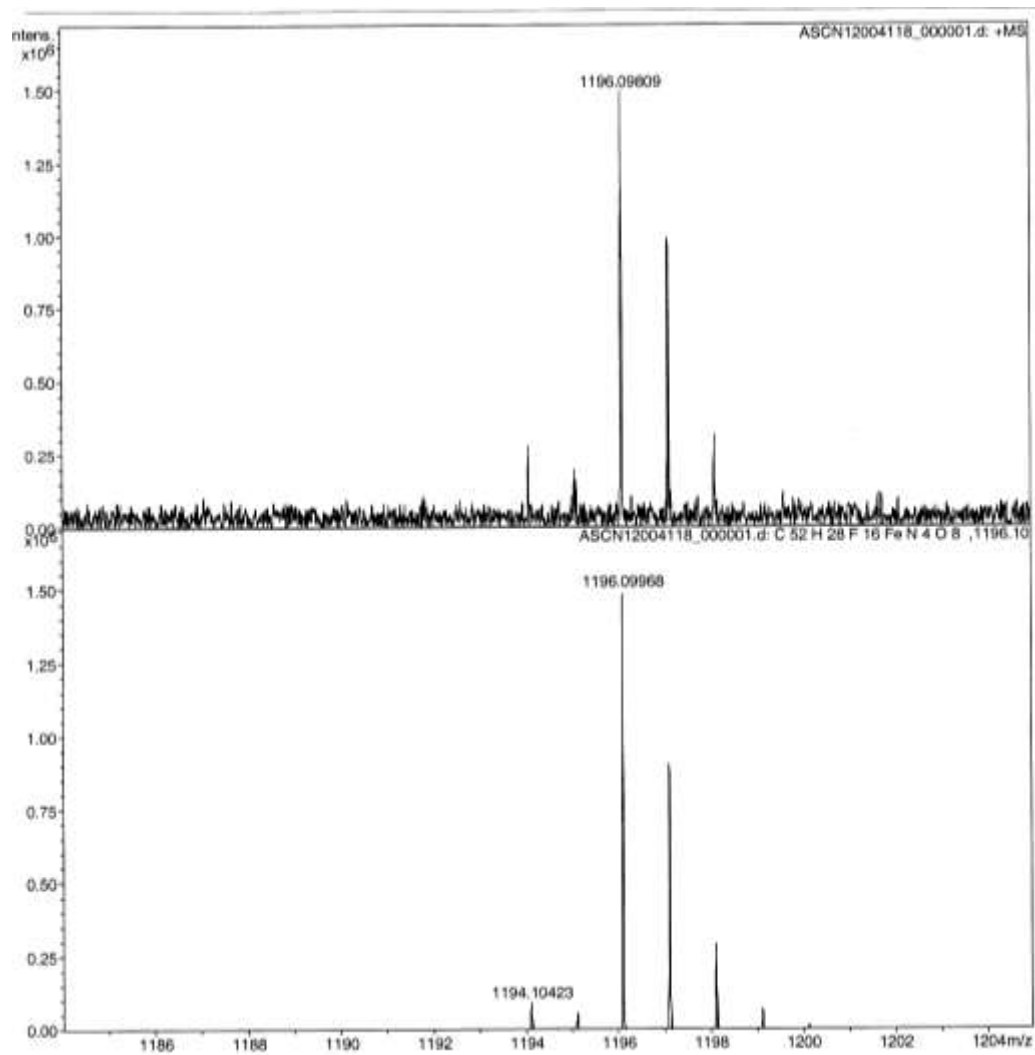

**Figure S18.** High-resolution mass spectra (FAB<sup>+</sup>) - porphyrin **FeP8**.

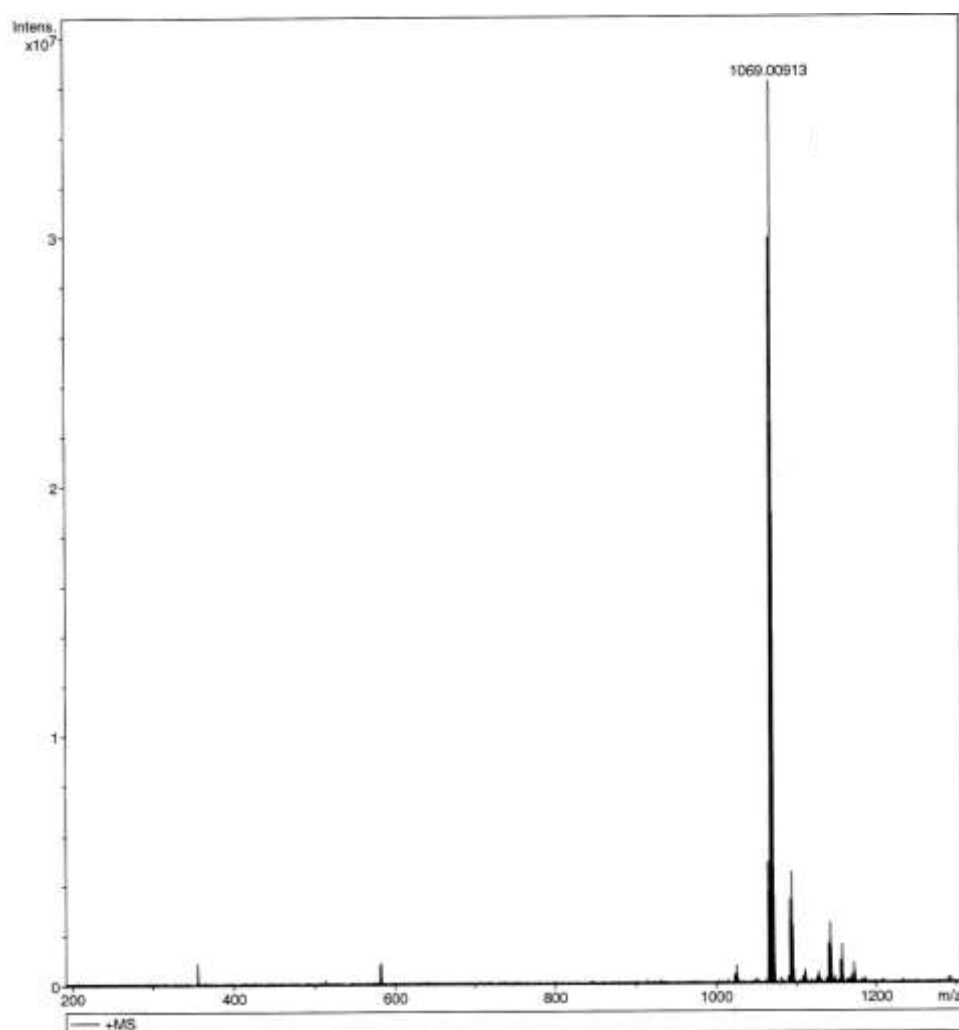

**Figure S19.** High-resolution mass spectra (FAB<sup>+</sup>) - porphyrin **MnP9**.

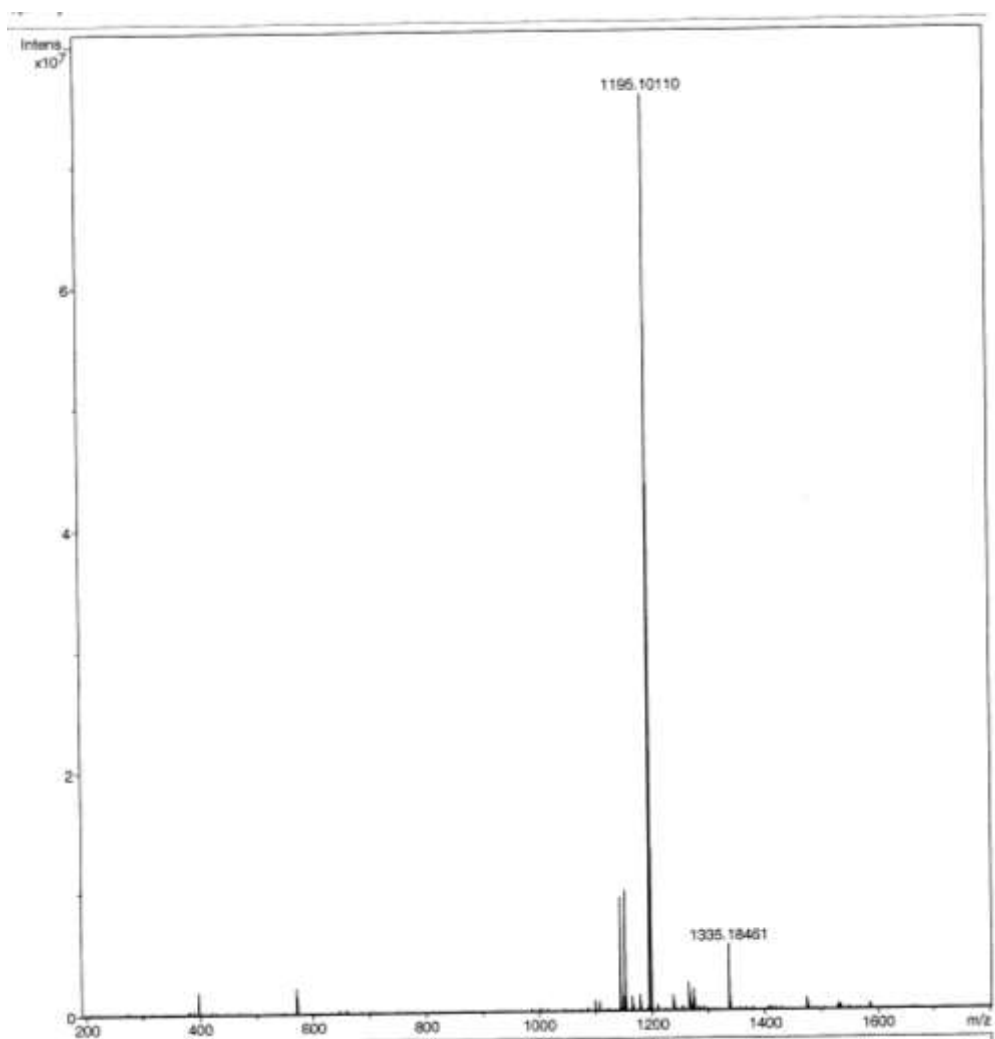

**Figure S20.** High-resolution mass spectra (FAB+) - porphyrin **MnP10**.
